# Supplementary material
Source: publisher figshare collection journal article supplement (https://karger.figshare.com/articles/dataset/_/6682706)
Supplement: Supplementary file 1 [file 1]

| AGE | cicle | Lifetables |          |          |            |          |             |
|-----|-------|------------|----------|----------|------------|----------|-------------|
|     |       | Male       | Female   | 44% male | Death rate | Alive    | Dead        |
| 66  | 0     | 0.013596   | 0.008851 | 0.010939 | 0.010939   | 1000     |             |
| 67  | 1     | 0.015086   | 0.010101 | 0.012294 | 0.012294   | 987.7056 | 12.2944     |
| 68  | 2     | 0.016238   | 0.010759 | 0.01317  | 0.01317    | 974.6978 | 25.3022457  |
| 69  | 3     | 0.018171   | 0.011865 | 0.01464  | 0.01464    | 960.4285 | 39.57146993 |
| 70  | 4     | 0.020729   | 0.013478 | 0.016668 | 0.016668   | 944.4197 | 55.58031526 |

|        |   |        |
|--------|---|--------|
| 1.0129 | 1 | 0.0129 |
|--------|---|--------|

|                     |        |     |        |
|---------------------|--------|-----|--------|
| Trial Diff in Costs | 351.47 | 100 | 251.47 |
|---------------------|--------|-----|--------|

| Interventic Control<br>HRQOL |          |          |          |
|------------------------------|----------|----------|----------|
| 1012.9                       | 1000     | 1.0129   | 1        |
| 966.6155                     | 954.3049 | 0.989758 | 0.977152 |
| 921.6284                     | 909.8908 | 0.967048 | 0.954732 |
| 877.4262                     | 866.2515 | 0.944642 | 0.932612 |
| 833.624                      | 823.0072 | 0.922439 | 0.910691 |

| Difference HRQoL |        | Interventic Control<br>Costs |         |
|------------------|--------|------------------------------|---------|
|                  | 0.0129 | 351,470                      | 100,000 |
|                  | 0.0126 | 335,410                      | 95,430  |
|                  | 0.0123 | 319,799                      | 90,989  |
|                  | 0.0120 | 304,461                      | 86,625  |
|                  | 0.0117 | 289,262                      | 82,301  |

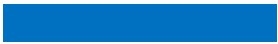

351.47      100.00

| Difference in Costs |  | ICER   |         |
|---------------------|--|--------|---------|
| 251                 |  | 19,494 |         |
| 251                 |  | 19,950 | 2years  |
| 251                 |  | 20,418 | 3 years |
| 251                 |  | 20,902 | 4 years |
| 251                 |  | 21,406 | 5 years |

| Threshold analysis |     |
|--------------------|-----|
|                    | 258 |
|                    | 252 |
|                    | 246 |
|                    | 241 |
|                    | 235 |
